# Supplementary material for: Integrative Differential Expression Analysis for Multiple EXperiments (IDEAMEX): A Web Server Tool for Integrated RNA-Seq Data Analysis
Source: PubMed Central journal article supplement (PMC6450261; doi:10.3389/fgene.2019.00279), 2019-03-29

# liverCvsliverT3

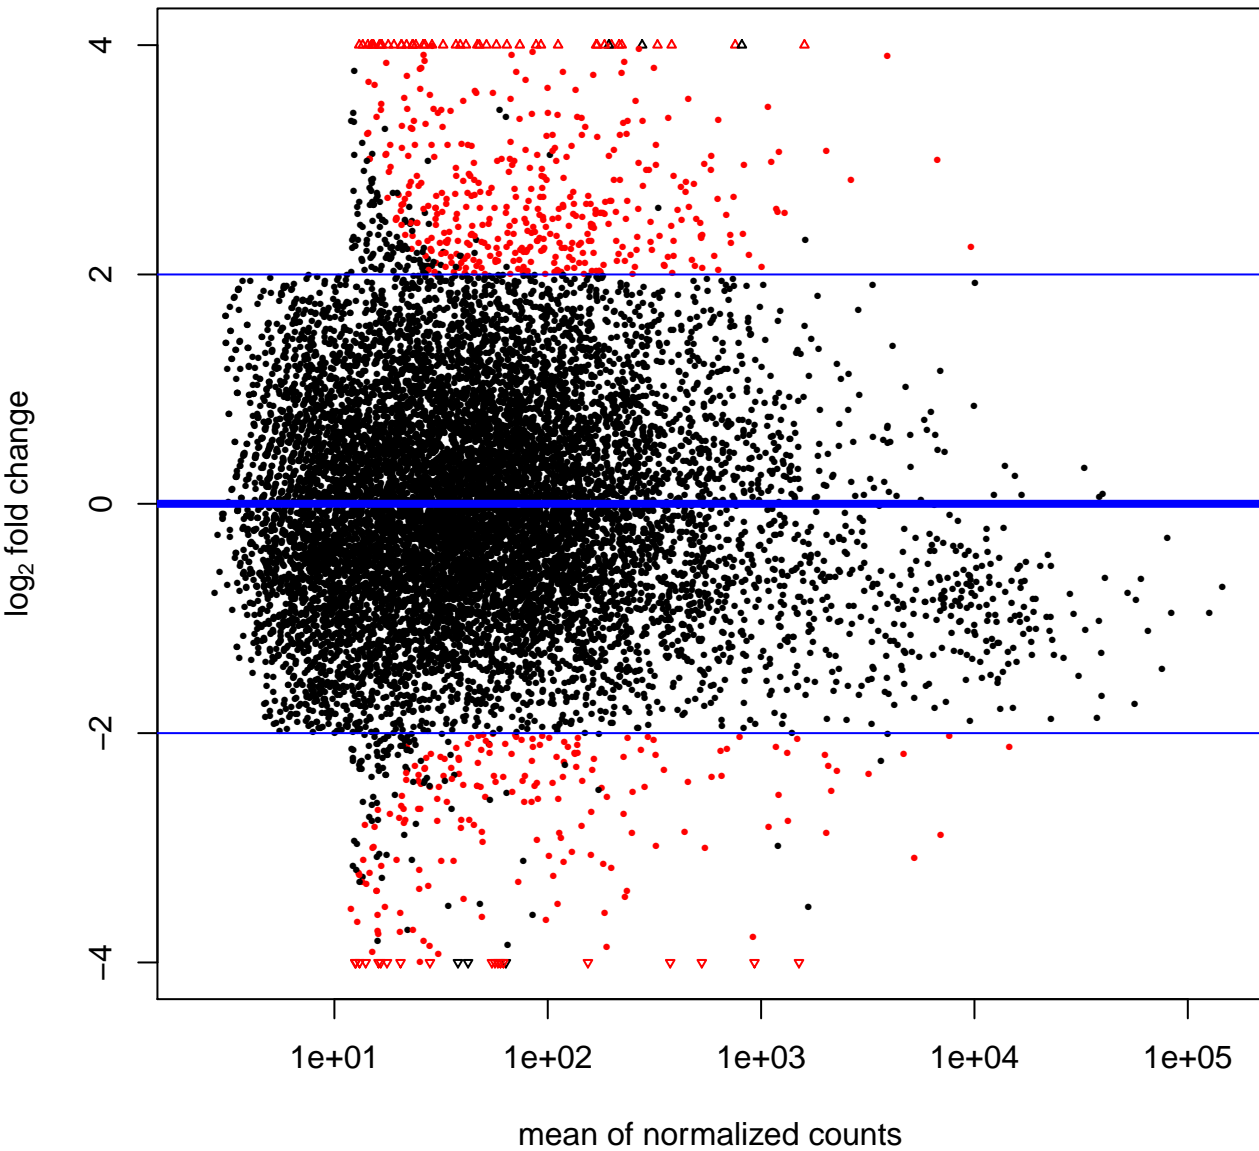

Supplement: Image_1.pdf [file Image_1.pdf]
