# Supplementary material for: Integrative Differential Expression Analysis for Multiple EXperiments (IDEAMEX): A Web Server Tool for Integrated RNA-Seq Data Analysis
Source: PubMed Central journal article supplement (PMC6450261; doi:10.3389/fgene.2019.00279), 2019-03-29

# Pval correlation liverCvsliverT2

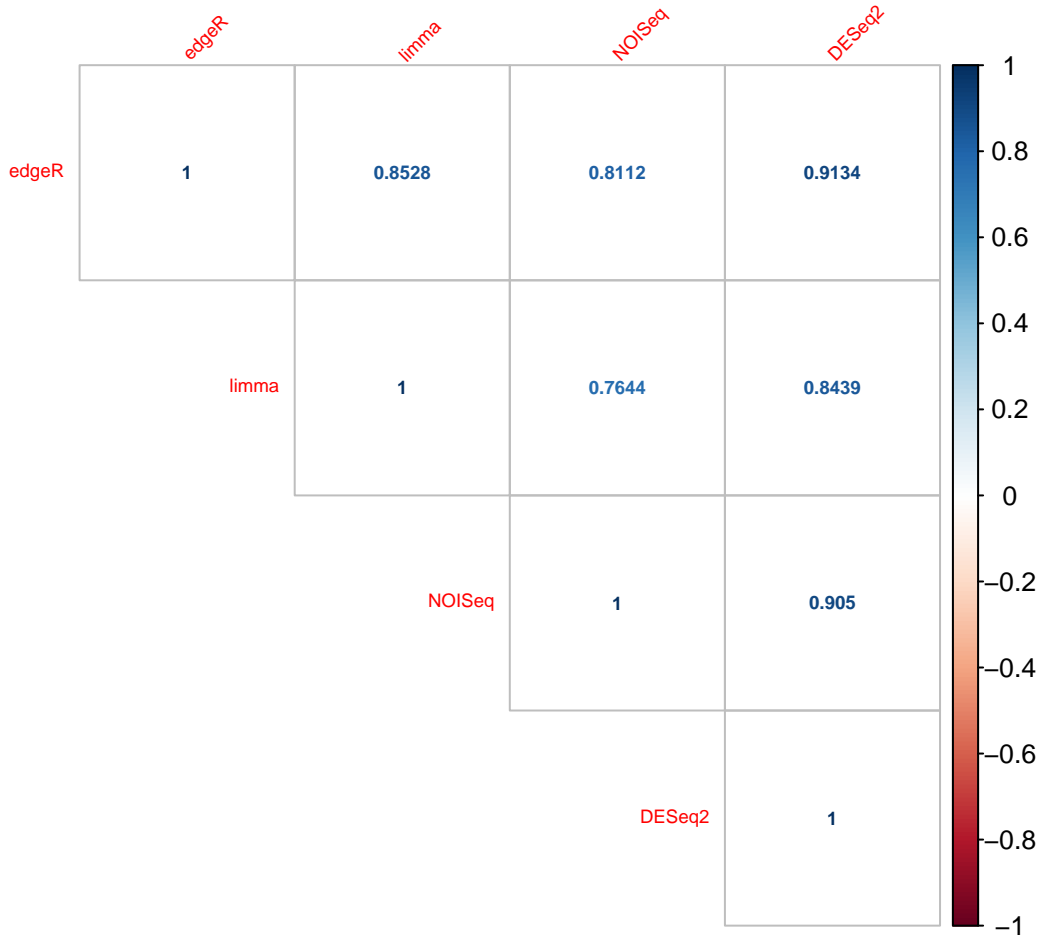

Supplement: Image_5.pdf [file Image_5.pdf]
